# Supplementary material for: Functional relationships of three NFU proteins in the biogenesis of chloroplastic iron‐sulfur clusters
Source: PubMed Central journal article supplement (PMC7851846; doi:10.1002/pld3.303), 2021-02-02
Supplement: PLD3-5-e00303-s001.pdf [file PLD3-5-e00303-s001.pdf]

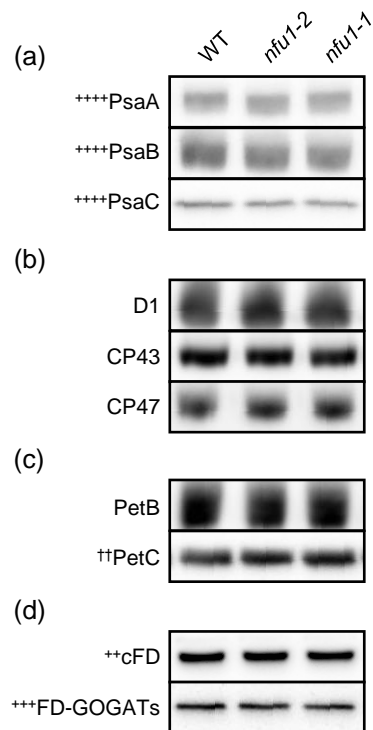

**Figure S1.** Immunoblots of representative iron-sulfur cluster-containing proteins and other photosynthetic proteins in the wild type and *nfu1* mutants. (a) Immunoblots of PSI reaction-center proteins PsaA, PsaB, and PsaC. (b) Immunoblots of PSII reaction-center proteins D1, CP43 and CP47. (c) Immunoblots of cytochrome *b<sub>6</sub>f* complex proteins PetB and PetC. (d) Immunoblots of chloroplast ferredoxin cFD and ferredoxin-dependent glutamine oxoglutarate aminotransferases FD-GOGATs. Thylakoid membrane proteins were used in (a-c) and were loaded on an equal chlorophyll basis. Leaf total proteins were used in (d) and were loaded on an equal total protein basis. Symbols ++, ††, +++, and ++++ indicate that the protein binds to classic 2Fe-2S, Rieske-type 2Fe-2S, 3Fe-4S, and 4Fe-4S, respectively. Four-week-old plants were used for SDS-PAGE and immunoblot analysis in this figure.

**Table S1.** Primers used in this study

| Primer          | Sequence                                | Use                                    |
|-----------------|-----------------------------------------|----------------------------------------|
| SALK_039254LP   | 5'-TTCGTCCCAGTACTCAAATGG-3'             | Left genomic primer for <i>nfu2-1</i>  |
| SALK_039254RP   | 5'-AATGGTTTCTGGTCCCATCTC-3'             | Right genomic primer for <i>nfu2-1</i> |
| GABI_791C01LP   | 5'-CCAAACTGGACTCTTGACCAG-3'             | Left genomic primer for <i>nfu3-2</i>  |
| GABI_791C01RP   | 5'-ATCAATTTCAAACCAAGGGG-3'              | Right genomic primer for <i>nfu3-2</i> |
| GABI_661F04LP   | 5'-TGAATACAAACATGAATGGCC-3'             | Left genomic primer for <i>nfu1-1</i>  |
| GABI_661F04RP   | 5'-GTCGAACGAAATCAGCAGAAC-3'             | Right genomic primer for <i>nfu1-1</i> |
| SALK_038073LP   | 5'-TGAATACAAACATGAATGGCC-3'             | Left genomic primer for <i>nfu1-2</i>  |
| SALK_038073RP   | 5'-GTCGAACGAAATCAGCAGAAC-3'             | Right genomic primer for <i>nfu1-2</i> |
| LBa1            | 5'-TGGTTCACGTAGTGGGCCATCG-3'            | Left border primer for SALK lines      |
| o8409           | 5'-ATATTGACCATCATACTCATTGC-3'           | Left border primer for GABI lines      |
| NFU1_L          | 5'-TTGATTTGGTGCTTGAGGAT-3'              | Left qRT-PCR primer for <i>NFU1</i>    |
| NFU1_R          | 5'-CCCATGTGCATAGTTGTTGAAG-3'            | Right qRT-PCR primer for <i>NFU1</i>   |
| ACT2_L          | 5'-CAAAGGCCAACAGAGAGAAGA-3'             | Left qRT-PCR primer for <i>ACT2</i>    |
| ACT2_R          | 5'-ATCACCAGAATCCAGCACAA-3'              | Right qRT-PCR primer for <i>ACT2</i>   |
| NFU1_BamH1_ATG  | 5'-ACACAGGATCCATGATGGCTTCTCTCGCGAC-3'   | Forward cloning primer for <i>NFU1</i> |
| NFU1_BamH1_noTP | 5'-ACACAGGATCCGCATCTGGTGTATCTTCAGGT-3'  | Forward cloning primer for <i>NFU1</i> |
| NFU1_Xho1_TAG   | 5'-ACACACTCGAGCTAGCTTGTAAGGTTACATTAG-3' | Reverse cloning primer for <i>NFU1</i> |
